# Supplementary material
Source: publisher figshare collection journal article supplement (https://sage.figshare.com/ndownloader/files/22124940)
Supplement: Supplementary file 1 [file 22124940]

*If yes, please write this feedback on the back of this form.*
